1 Longitudinal data reveal strong genetic and weak non-genetic components of ethnicity-dependent  
2 blood DNA methylation levels

3  
4 Chris McKennan<sup>1\*</sup>, Katherine Naughton<sup>3</sup>, Catherine Stanhope<sup>3</sup>, Meyer Kattan<sup>4</sup>, George T. O'Connor<sup>5</sup>,  
5 Megan T. Sandel<sup>5</sup>, Cynthia M. Visness<sup>6</sup>, Robert A. Wood<sup>7</sup>, Leonard B. Bacharier<sup>8</sup>, Avraham Beigelman<sup>8</sup>,  
6 Stephanie Lovinsky-Desir<sup>4</sup>, Alkis Togias<sup>9</sup>, James E. Gern<sup>10</sup>, Dan Nicolae<sup>2,3¶</sup> Carole Ober<sup>3¶</sup>

7  
8 <sup>1</sup>Department of Statistics, University of Pittsburgh, Pittsburgh, PA

9 <sup>2</sup>Department of Statistics, University of Chicago, Chicago, IL

10 <sup>3</sup>Department of Human Genetics, University of Chicago, Chicago, IL

11 <sup>4</sup>Department of Pediatrics, Columbia University Medical Center, New York, NY

12 <sup>5</sup>Department of Medicine, Boston University School of Medicine, Boston, MA

13 <sup>6</sup>Rho Federal Systems Division, Chapel Hill, NC

14 <sup>7</sup>Department of Pediatrics, Johns Hopkins University Medical Center, Baltimore, MD

15 <sup>8</sup>Department of Pediatrics, Washington University School of Medicine and St Louis Children's Hospital,  
16 St. Louis, MO

17 <sup>9</sup>National Institute of Allergy and Infectious Disease, Bethesda, MD

18 <sup>10</sup>Departments of Pediatrics and Medicine, University of Wisconsin School of Medicine and Public Health,  
19 Madison WI

20

21 ¶ Equal contributions

22

23 \*Corresponding Author

24 Email: [chm195@pitt.edu](mailto:chm195@pitt.edu)

25

## Abstract

26

27

28

29

30

31

32

33

34

35

36

37

38

Epigenetic architecture is influenced by genetic and environmental factors, but little is known about their relative contributions or longitudinal dynamics. Here, we studied DNA methylation (DNAm) at over 750,000 CpG sites in mononuclear blood cells collected at birth and age 7 from 196 children of primarily self-reported Black and Hispanic ethnicities to study race-associated DNAm patterns. We developed a novel Bayesian method for high dimensional longitudinal data and showed that race-associated DNAm patterns at birth and age 7 are nearly identical. Additionally, we estimated that up to 51% of all self-reported race-associated CpGs had race-dependent DNAm levels that were mediated through local genotype and, quite surprisingly, found that genetic factors explained an overwhelming majority of the variation in DNAm levels at other, previously identified, environmentally-associated CpGs. These results not only indicate that race-associated DNAm patterns in blood are present at birth and are primarily genetically, and not environmentally, determined, but also that DNAm in blood cells overall is robust to many environmental exposures during the first 7 years of life.

## 39 **Introduction**

40 DNA methylation (DNAm) in the human genome plays a critical in regulating many cellular pro-  
41 cesses [1, 2], and altered DNAm patterns have been associated with many diseases, including  
42 cancer [3], neurological disorders [4, 5] and asthma [6, 7], to name a few. DNAm itself reflects the  
43 contributions of genetic variation [8, 9], exposure histories [10–16], and biological factors such  
44 as age [17–26], and has therefore been suggested as a mediator of the effect of these factors on  
45 disease outcomes [27, 28].

46 Recently, results from cross-sectional studies have shown that DNAm in blood cells differs  
47 across racial and ethnic groups at birth [29, 30] and later in life [31–34], suggesting that it might  
48 contribute to race/ethnicity-associated health disparities [30, 31]. Because racial and ethnic group  
49 definitions reflect both common genetic ancestries and shared exposure histories [35], it has been  
50 postulated that race/ethnicity-associated blood DNAm patterns are an amalgam of genetic and  
51 non-genetic components, and understanding the contribution of each can help inform the relative  
52 contribution of genetic and socio-cultural diversity to variation in DNAm levels [31]. For example,  
53 a previous study [31] partitioned variation in DNAm levels into genetic and non-genetic sources,  
54 and concluded that non-genetic, socio-cultural sources had a significant impact on blood DNAm  
55 levels. However, that study, and all previous studies that identified race/ethnicity-associated DNAm  
56 marks, relied on cross-sectional data and were therefore not able to asses the temporal stability of  
57 those marks. Understanding the stability of race/ethnicity-dependent DNAm present at young  
58 ages can help to determine the extent to which race/ethnicity-dependent properties of epigenetic-  
59 driven diseases can be attributed to the innate or acquired methylome [29], and identify CpGs  
60 whose DNAm is robust or sensitive to accumulated exposures. We therefore sought to fill this  
61 gap by first identifying the factors contributing to and the temporal stability of race/ethnicity-  
62 dependent blood DNAm levels, and consequently, determining the relative contributions of genetic  
63 and environmental factors to the variation in blood DNAm levels in general.

64 To do so, we studied global DNAm patterns at over 750,000 CpG sites on the Illumina EPIC

65 array in cord blood mononuclear cells (CBMCs) collected at birth and in peripheral blood mononu-  
66 clear cells (PBMCs) collected at 7 years of age from 196 children participating in the Urban En-  
67 vironment and Childhood Asthma (URECA) birth cohort study [36, 37]. This cohort is part of the  
68 NIAID-funded Inner City Asthma Consortium and is comprised of children primarily of Black and  
69 Hispanic self-reported ethnicity, with a mother and/or father with a history of at least one allergic  
70 disease, and living in low socioeconomic urban areas (see O'Connor et al. [37] for details of en-  
71 rollment criteria). Mothers of children in the URECA study were enrolled during pregnancy and  
72 children were followed from birth through at least 7 years of age.

73 The longitudinal design of the URECA study provided us with the resolution to partition  
74 genetic from non-genetic effects on race/ethnicity-associated DNAm patterns, and yielded new in-  
75 sight into the factors affecting DNAm patterns at CpG sites in mononuclear (immune) cells during  
76 early life in ethnically admixed children. Using a novel statistical method that provides a gen-  
77 eral framework for analyzing longitudinal genetic and epigenetic data, we show that while DNAm  
78 levels vary with chronological age, race/ethnicity-dependent DNAm patterns are overwhelmingly  
79 conserved over the first 7 years of life and that these patterns are strongly associated, and often me-  
80 diated, by local genotype. Relatedly, the variation in DNAm levels at previously reported robust  
81 exposure-associated CpGs was overwhelmingly dominated by genetic rather than environmental  
82 factors in these children. Considering the results of our study and those of a recently published  
83 comprehensive review on environmental epigenetics research [38], we suggest that race/ethnicity-  
84 dependent blood DNAm levels in particular, and blood DNAm levels in general, are primarily  
85 driven by genetic factors, and are not as responsive to environmental exposures as previously sug-  
86 gested [31], at least during the first 7 years of life.

## 87 **Results**

88 Our study included 196 children participants in the URECA cohort who had high quality DNA  
89 from both CBMCs and PBMCs collected at birth and age 7, respectively, available for our study  
90 [36] (see Methods). The URECA children were classified by parent- or guardian-reported race into

91 one of the following categories: Black,  $n = 147$ ; Hispanic,  $n = 39$ ; White,  $n = 1$ ; Mixed race  $n = 7$ ,  
92 and Other,  $n = 2$ . A description of the study population is shown in Table 1. Genetic ancestry,  
93 assessed using principle component analysis (PCA), revealed varying proportions of African and  
94 European ancestry along PC1 (Figure 1). Because there was little separation along PC2, and no  
95 genome-wide significant correlation between PC2 through PC10 and DNAm levels at either age,  
96 we defined PC1 as inferred genetic ancestry. The reported races of the children are also shown  
97 in Figure 1. We included only the 186 self-reported Black and Hispanic children in subsequent  
98 analyses of reported race.

### 99 **Reported race effects on DNA methylation patterns are conserved in magnitude and direction** 100 **between birth and age 7**

101 We first attempted to determine the temporal stability of reported race-associated DNAm patterns  
102 by addressing three questions. What is the correlation between reported race and DNAm levels at  
103 individual CpG sites at birth and age 7? Is the direction and magnitude of the correlation between  
104 reported race and DNAm levels conserved between birth and age 7? Does the correlation between  
105 DNAm levels and reported race differ significantly between birth and age 7? While these questions  
106 are important in their own right, their answers can also help determine the nature of these reported  
107 race-associated patterns. For example, race-associated DNAm levels that differ at birth and age  
108 7 might reflect race-dependent exposure histories, while race-associated DNAm patterns that are  
109 conserved may be genetic in nature, since genetically-dependent DNAm patterns are conserved  
110 from birth to later childhood [39].

111 Standard hypothesis testing can be used to answer the first question but is not appropriate  
112 for answering the second or third because failure to reject the null hypothesis that the effects are  
113 equal at birth and age 7 does not imply the null hypothesis is true. Additionally, because our  
114 studies were conducted in CBMCs at birth and PBMCs at age 7, DNAm levels at birth and age 7  
115 may differ slightly due to differences in cell composition [40]. To address these issues, we built  
116 a Bayesian model (see Model (1) in Methods) and let the data determine both the strength of the

117 correlation between reported race (based on self-report) and DNAm levels, and how similar the  
118 correlations are at birth and age 7. We then answered the above three questions by defining and  
119 estimating the conserved (con) and discordant (dis) sign rates for each CpG  $g = 1, \dots, 784,484$ :

120  $con_g$  = Posterior probability that CpG  $g$ 's ancestry effects at birth and age 7 were non-zero,  
121 had the same sign AND the sign was estimated correctly.

122  $dis_g$  = Posterior probability that the ancestry effect for CpG  $g$  was non-zero at one age and  
123 zero or in the opposite direction at the other age.  
124

125 For a given posterior probability threshold, these quantities partition the ancestry-associated CpGs  
126 into two groups: those whose ancestry effects were non-zero and conserved from birth to age 7 and  
127 those whose ancestry effects were different at birth and age 7. Detailed descriptions of our model  
128 and estimation procedure are provided in the “Joint modeling of DNA methylation at birth and age  
129 7” section in Methods. Supplemental Figure S1 provides insight into how the conserved sign rate  
130 compares with standard univariate  $P$  values.

131 After fitting the relevant parameters in the model to the data, we were able to estimate the  
132 fraction of CpGs with non-zero reported race effects at both ages and assign them into one of four  
133 possible bins: the two effects were completely unrelated ( $\rho = 0$ ), moderately similar ( $\rho = 1/3$ ),  
134 very similar ( $\rho = 2/3$ ), or identical ( $\rho = 1$ ). Note that if a non-trivial fraction of CpG sites had  
135 ancestry effects that were in opposite directions at birth and age 7, they would be assigned to the  
136 first bin ( $\rho = 0$ ). In fact, we estimated that only 0.2% of the CpGs with non-zero reported effects  
137 at both ages had unrelated or moderately similar reported race effects, whereas 30.7% fell in the  
138 very similar bin and 69.1% had identical reported race effects at birth and age 7 (Supplemental  
139 Figure S2). These data indicate that when reported race effects on DNAm levels are present (i.e.,  
140 non-zero) at both birth and age 7, they tend to be very similar or exactly the same at both ages with  
141 respect to both direction and magnitude.

142 We then estimated the conserved and discordant sign rates for all 784,484 probes and clas-

143 sified a CpG as a reported race-associated CpG (RR-CpG) if its conserved or discordant sign rate  
144 was above 0.80 (i.e.  $con_g \geq 0.8$  or  $dis_g \geq 0.8$ ). At this threshold, we identified 2,162 RR-CpGs,  
145 2,157 (99.8%) of which were conserved in sign ( $con_g \geq 0.8$ ). Compared to self-reported His-  
146 panic children, self-reported black children tended to have higher DNAm levels at 1,288 (60%)  
147 of the conserved RR-CpGs ( $P = 8.6 \times 10^{-38}$ ). This trend replicated when we substituted inferred  
148 genetic ancestry for reported race and is in accordance with previous observations [6, 33], indi-  
149 cating individuals with more African ancestry tend to have overall more DNAm. Interestingly,  
150 there was an under enrichment of RR-CpGs in CpG islands ( $P = 3.10 \times 10^{-12}$ ), which mirrors the  
151 observation that CpGs whose DNAm is under genetic control typically lie outside of CpG islands  
152 [41]. The fact that only 5 of the 2,162 RR-CpGs had discordant reported race effects at birth and  
153 age 7 ( $dis_g \geq 0.8$ ) corroborates the observations made in the previous paragraph and answers the  
154 second question in the affirmative: if DNAm levels are correlated with reported race at birth, the  
155 magnitude and direction of the correlation is almost certainly conserved at age 7 (and vice-versa).

### 156 **Inferred genetic ancestry is more correlated with DNA methylation than is self-reported race**

157 The observed correlations between ancestry and DNAm levels may reflect differences in envi-  
158 ronmental exposures [31, 33], due to associations between race or ethnicity with socio-cultural,  
159 nutritional, and geographic exposures, among others [42]. In fact, a previous cross sectional study  
160 suggested that self-reported ethnicity explained a substantial proportion of the variance of blood  
161 DNAm levels measured in Latino children of diverse ethnicities [31]. They concluded that eth-  
162 nicity captured genetic, as well as the socio-cultural and environmental differences, that influence  
163 DNAm levels. If this were the case in the URECA children, the effect of inferred genetic ancestry  
164 on DNAm levels should be comparable to that of reported race. To assess this possibility in the  
165 URECA children, we repeated the analyses described above but substituted inferred genetic an-  
166 cestry for reported race. This analysis revealed 8,597 inferred genetic ancestry-associated CpGs  
167 (IGA-CpGs), of which 8,579 (99.8%) were conserved in sign ( $con_g \geq 0.8$ ). This was significantly  
168 more than the 2,162 RR-CpGs identified in the reported race analysis above (Figures 2a-b).

169 To further explore this finding, we examined the overlap between RR-CpGs and IGA-CpGs  
170 (Figure 2c). Because reported race is an estimate of inferred genetic ancestry, there is a substantial  
171 overlap between IGA-CpGs and RR-CpGs. Contrary to the results from the previous study [31],  
172 which estimated that only 35% of their ethnicity-associated were also genetic ancestry-associated  
173 CpGs (Figure 5A in [31]), 66% of RR-CpGs in our study were also IGA-CpGs, and therefore  
174 represent only a subset of the IGA-CpGs. This indicates that while IGA-CpGs include most RR-  
175 CpGs, reported race does not capture most of the variation in DNAm levels attributable to genetic  
176 ancestry in these children.

177 The differences between our results and those reported in the aforementioned study may be  
178 due to the fact that sample collection site explained 80% of the variance in Mexican versus Puerto  
179 Rican ethnicity in [31], but was not accounted for in their analyses. The fact that sample collection  
180 site was associated with the DNAm levels of 865 CpGs at birth or age 7 at a 5% FDR in our study  
181 suggests that sample collection site could have confounded the relationship between ethnicity and  
182 DNAm in the previous study (see page 3 in the Supplement for details).

### 183 **The association between DNA methylation and reported race is largely genetically driven**

184 To further address the question of whether reported race effects on DNAm levels at either birth or  
185 age 7 were primarily due to genetic variation or to environmental exposures, we used local genetic  
186 variation (within 5kb of a CpG site) and DNAm data at birth and age 7 in the 147 self-reported  
187 Black children in our study to map methylation quantitative trait loci (meQTLs). Of the 519,696  
188 CpGs within 5kb of a SNP, 65,068 and 70,898 had at least one meQTL in CBMCs at birth and in  
189 PBMCs at age 7, respectively, at an FDR of 5%. In addition, 51% of all RR-CpGs with at least one  
190 SNP in the  $\pm 5$ kb window had at least one meQTL at birth or age 7 at an FDR of 5%, which was a  
191 significant enrichment when compared to the 17% observed for non-RR-CpGs (Figure 3a-b).

192 To provide additional evidence that local genotype mediates the effect of reported race on  
193 DNAm levels, we used logistic regression to regress the genotype of each SNP within  $\pm 5$ kb of a  
194 RR-CpGs. The goal was to determine the fraction of RR-CpGs at which the observed variation



195 was mediated through local genotype, i.e. RR-CpGs with both edges  $a$  and  $c$  in Figure 3a. Since  
196 genotype is highly correlated with race, most SNPs will possess edge  $c$ . Therefore, a reasonable  
197 upper bound for this quantity is 51%, the fraction of RR-CpGs with at least one meQTL in their  
198  $\pm 5$ kb window. To determine a lower bound, we used the results of the abovementioned logistic  
199 regression to conservatively estimate that at least 26% of all RR-CpGs with at least one SNP in  
200 their  $\pm 5$ kb windows had both edges  $a$  and  $c$  (see pages 3-5 in the Supplementary Material for  
201 calculation details). Interestingly, substituting inferred genetic ancestry for self-reported race in  
202 the above analysis yielded nearly identical upper and lower bounds, providing evidence for local  
203 genotype mediating the effects of reported race on DNAm levels at RR-CpGs.

#### 204 **Genetic and biological factors explain most of the variation in blood DNA methylation levels**

205 Given the suggested genetic nature of race/ethnicity-dependent blood cell DNAm levels, we next  
206 sought to determine the relative contributions of genetic variation, age and environmental factors  
207 on CMBC and PBMC DNAm levels in general at birth and age 7 in the URECA cohort. First, we  
208 identified 2,836 gestational age-related CpGs at birth and 16,172 age-related CpGs (CpGs whose  
209 DNAm levels changed from birth to age 7) at 5% FDRs. These two sets of CpGs were strongly  
210 enriched for CpGs used to predict gestational age in Knight et al. [21] and to predict chronological  
211 age in Horvath [18], as well as for CpGs whose blood DNAm levels changed from birth to age 5 in  
212 Pérez et al. [43] (see Supplemental Figure S3). Moreover, the estimates of the age effects among  
213 age-related CpGs in our study showed the same direction of change as their corresponding esti-  
214 mated gestational age effects at birth in 97% of the 16,172 age-related CpGs. This included 14,186  
215 gestational age-associated effects that were not significant at a 5% FDR threshold but showed the  
216 same direction of change. This concordance in direction of effect is unlikely to occur by chance ( $P$   
217 value  $< 10^{-119}$ , pages 5-7 of the Supplementary Material for calculation details). Taken together  
218 with the enrichments for age-associated CpGs described above, we suggest that the majority of  
219 the changes in DNAm levels from birth to age 7 is due to aging-related mechanisms rather than  
220 age-dependent environmental exposures.

221 We next attempted to determine the relative contributions of genetic and environmental fac-  
222 tors on DNAm levels in blood. With the exception of maternal cotinine levels during pregnancy,  
223 which previously showed robust and reproducible associations with blood DNAm levels at birth  
224 [11–15] and in early childhood [10, 13, 16], none of the direct or indirect measures of exposures  
225 that were available in this cohort were associated with DNAm levels at either age after adjusting  
226 for multiple testing (see pages 1-2 in the Supplementary Material for a complete list). Therefore, in  
227 order to maximize our chances of identifying environmental variation in these data, we restricted  
228 our analyses to the 6,073 maternal smoking-related CpGs identified in Joubert et al. [15], who  
229 performed a meta analysis of maternal smoking during pregnancy on 6,685 infants from 13 co-  
230 horts. In our data, DNAm levels at birth and age 7 at 505 (9.2%) and 407 (7.4%) of the 5,500  
231 maternal smoking-related CpGs that passed QC in our study, respectively, were nominally cor-  
232 related ( $P$  value  $\leq 0.05$ ) with maternal cotinine levels (enrichment  $P$  values =  $7.08 \times 10^{-34}$  and  
233  $6.49 \times 10^{-8}$ ). While this enrichment was not unexpected, we were surprised to observe that the  
234 maternal smoking-related CpGs were enriched for meQTLs (Figure 4a). Additionally, there was  
235 a strong enrichment of the 8,579 conserved inferred genetic ancestry-associated CpGs among the  
236 5,500 maternal smoking-related CpGs that passed QC in our study (fold enrichment = 2.53;  $P$   
237 value =  $6.42 \times 10^{-33}$ ), indicating the maternal smoking-related CpGs were enriched for geneti-  
238 cally regulated CpGs. Furthermore, genotype at the closest SNP for over 95% of the maternal  
239 smoking-related CpGs explained a greater proportion of the variance in DNAm levels at birth than  
240 did maternal cotinine levels (Figure 4b, see pages 7-9 in the Supplementary Material for analysis  
241 details). These results were identical for DNAm measured at age 7, and showed that genetic, and  
242 not environmental, factors are responsible for the majority of the variation in DNAm levels at even  
243 the most robust and replicated environmentally-associated CpGs in these children.

## 244 Discussion

245 The relationships between DNAm, chronological age, and race/ethnicity have the potential to shed  
246 light on disease etiology and may help determine the relative genetic and environmental contribu-

247 tions to the observed inter-individual variability of the epigenome [17–23, 29–34]. While it has  
248 previously been shown that race/ethnicity is related to DNAm in cross-sectional studies [29–34]  
249 and that statistically significant meQTLs are conserved as individuals age [39], it has yet to be  
250 shown that race/ethnicity-dependent DNAm marks are conserved as children age, and relatedly,  
251 that exposure histories explain a comparatively small fraction of the variation in DNAm levels.

252 Even though there was substantial change in blood DNAm levels over time among children in  
253 this cohort, self-reported race effects on DNAm were overwhelmingly conserved in both direction  
254 and magnitude from birth to age 7. This result, as well as our novel Bayesian inference paradigm  
255 used to obtain it, is important in and of itself because it provides an example of, and a general  
256 method for identifying, DNAm patterns that are conserved over time, and differentiating between  
257 environmentally responsive and temporally stable DNAm marks, which has been highlighted as  
258 both a gap in current knowledge and a critical area of future epigenetic research [44]. The con-  
259 sistency of our estimates for inferred genetic ancestry and reported race effects on DNAm levels  
260 also demonstrates the fidelity of our processing pipeline that accounts for unobserved factors, in-  
261 cluding cell composition, because failure to account for latent covariates can lead to biased and  
262 irreproducible estimates [45, 46].

263 While the observation that reported race effects are conserved from birth to age 7 gives cre-  
264 dence to the hypothesis that the effects are genetic in nature, it does not rule out the possibility  
265 of environmental components or gene-environment interactions that could result in race/ethnicity-  
266 associated DNAm patterns prior to birth that persist as the child ages. It was therefore interesting  
267 to find that there was a significant under enrichment of RR-CpGs in CpG islands, which agrees  
268 with the under enrichment previously observed for CpGs under genetic control [41]. To further  
269 explore this, we showed that the RR-CpGs were enriched among CpGs with meQTLs identified  
270 in our study, indicating that DNAm levels at many of the RR-CpGs are mediated by local geno-  
271 type and that much of the reported race-DNAm correlation could be attributed to genetic variation.  
272 Moreover, the RR-CpGs were only a small subset of inferred genetic ancestry associated CpGs  
273 (IGA-CpGs) in our study. This is contrary to the findings of Galanter et al. [31], who argued that

274 ethnicity-dependent DNAm patterns in admixed populations capture both genetic variation and  
275 differences in accumulated exposures. Our results provide evidence for genetics accounting for an  
276 overwhelming majority of the correlation between DNAm levels and reported race, which suggests  
277 the non-genetic contribution to variability in blood DNAm levels may be smaller than previously  
278 thought.

279 There were several other notable features in these data connoting that genetic, and not envi-  
280 ronmental, factors were most responsible of the variation in blood DNAm levels in these children.  
281 The first was that although average DNAm levels of 16,172 CpGs changed significantly from  
282 birth to age 7, the direction of the change in 97% of those CpGs matched the direction of the  
283 corresponding correlation between DNAm levels and gestational age at birth. This manifest con-  
284 cordance in the “epigenetic clocks” present at birth and later in life, along with the observation that  
285 the 16,172 age-related CpGs were enriched for CpGs used to predict gestational and chronological  
286 age, suggests these age-related changes are coordinated by age-related mechanisms, and not due  
287 to age-dependent environmental exposures. Second, with the exception of maternal cotinine levels  
288 during pregnancy, none of the direct or indirect measures of exposure history were associated with  
289 DNAm levels at birth or age 7. This observation is congruent with the results of a recent compre-  
290 hensive review on environmental epigenetics research, which suggested that the effects of many  
291 environmental exposures on DNAm in blood are probably too small to estimate with even large  
292 sample sizes [38].

293 The third, and possibly most surprising, observation in support of strong genetically- and  
294 weak environmentally-determined blood DNAm levels was that genetic, and not maternal coti-  
295 nine levels, were most responsible for the variation in DNAm levels at over 95% of the maternal  
296 smoking-associated CpGs identified in Joubert et al. [15]. This is consistent with, and significantly  
297 extends, the results in Gonseth et al. [47], which identified genome-wide significant meQTLs for  
298 three of the top ten most significant maternal smoking CpGs identified in the Joubert et al. study.  
299 One possibility explanation for our observation, as demonstrated in the Gonseth et al. study, is that  
300 genotype confounds the relationship between maternal smoking and DNAm. While we did not

301 have sufficient data to confirm this here, it remains an important area of future investigation.

302 In summary, the results of our study suggest that DNAm levels in blood cells are fairly robust  
303 to environmental exposures, including those that are correlated with self-reported race. A better  
304 understanding of tissue-specific DNAm responses to environmental exposures could inform the  
305 design of future studies and provide insights into the mechanisms through which exposures and  
306 gene-environment interactions influence health and disease.

## 307 **Materials and methods**

### 308 **Sample composition**

309 URECA is a birth cohort study initiated in 2005 in Baltimore, Boston, New York City and St. Louis  
310 under the NIAID-funded Inner City Asthma Consortium [36]. Pregnant women were recruited.  
311 Either they or the father of their unborn child had a history of asthma, allergic rhinitis, or eczema,  
312 and deliveries prior to 34 weeks gestation were excluded (see Gern et al. [36] for full entry criteria).  
313 Informed consent was obtained from the women at enrollment and from the parent or legal guardian  
314 of the infant after birth.

315 Maternal questionnaires were administered prenatally and child health questionnaires admin-  
316 istered to a parent or caregiver every 3 months through age 7 years. Gestational age at birth and  
317 obstetric history were obtained from medical records. Additional details on study design are de-  
318 scribed in Gern et al. [36]. Frozen paired cord blood mononuclear cells (CBMCs) and peripheral  
319 blood mononuclear cells (PBMCs) at age 7, were available for 196 of the 560 URECA children  
320 after completing other studies. After QC, DNAm data were available for 194 children at birth,  
321 195 children at age 7, and 193 children at both time points; genotype data were available in 193  
322 children (194 at birth; 195 at age 7). The sample size for each analysis is given in Table 2.

323 Maternal cotinine levels were measured in the cord blood plasma at birth, and we categorized  
324 mothers as smokers ( $\geq 10\text{ng/mL}$ ;  $n = 31$ ) or non-smokers ( $< 10\text{ng/mL}$ ;  $n = 150$ ), where cotinine  
325 levels were missing in 15 mothers. The  $10\text{ng/mL}$  threshold was the same as that used in Joubert

326 et al. [15] to define a pregnant mother with a sustained smoking habit, where 147/150 (98%) of the  
327 non-smokers in our data had cotinine levels below 2ng/mL, the detection limit of the assay.

### 328 **DNA methylation**

329 DNA for methylation studies was extracted from thawed CBMCs and PBMCs using the Qiagen  
330 AllPrep kit (QIAGEN, Valencia, CA). Genome-wide DNA methylation was assessed using the  
331 Illumina Infinium MethylationEPIC BeadChip (Illumina, San Diego, CA) at the University of  
332 Chicago Functional Genomics Facility (UC-FGF). Birth and 7-year samples from the same child  
333 were assayed on the same chip and the data were processed using Minfi [48]; Infinium type I  
334 and type II probe bias were corrected using SWAN [49]. Raw probe values were corrected for  
335 color imbalance and background by control normalization. Three out of the 392 samples (two at  
336 birth and one at age 7) were removed as outliers following normalization. We removed 82,352  
337 probes that mapped either to the sex chromosomes or to more than one location in a bisulfite-  
338 converted genome, had detection  $P$  values greater than 0.01% in 25% or more of the samples, or  
339 overlapped with known SNPs with minor allele frequency of at least 5% in African, American  
340 or European populations. After processing, 784,484 probes were retained and M-values were  
341 used for all downstream analyses, which were computed as  $\log_2(\text{methylated intensity} + 100) -$   
342  $\log_2(\text{unmethylated intensity} + 100)$ . The offset of 100 was recommended in Du et al. [50].

### 343 **Genotyping**

344 DNA from the 196 URECA children was genotyped with the Illumina Infinium CoreExome+Custom  
345 array. Of the 532,992 autosomal SNPs on the array, 531,755 passed Quality control (QC) (exclud-  
346 ing SNPs with call rate < 95%, Hardy-Weinberg  $P$  values <  $10^{-5}$ , and heterozygosity outliers). We  
347 conducted all analyses in 293,696 autosomal SNPs with a minor allele frequency  $\geq 5\%$ . Genotypes  
348 for three children failed QC and were excluded from subsequent analysis that involved genotypes,  
349 including methylation quantitative locus (meQTL) mapping, inferred genetic ancestry, or used ge-  
350 netic ancestry PC1 as a covariate. These three children were included in all other analyses.

## 351 **Estimating inferred genetic ancestry**

352 Ancestral principal component analysis (PCA) was performed using a set of 801 ancestry infor-  
353 mative markers (AIMs) from Tandon et al. [51] that were genotyped in both the URECA children  
354 and in HapMap [52] release 23.

## 355 **Univariate statistical methods**

356 To determine the effect of gestational age and maternal cotinine levels (smoker vs. non-smokers)  
357 on DNAm levels in CBMCs at birth or PBMCs at age 7, we used standard linear regression models  
358 with the child's gender, sample collection site, inferred genetic ancestry and methylation plate  
359 number as covariates in our model. We controlled for gestational age in the maternal cotinine  
360 analysis. We also estimated cell composition and other unobserved confounding factors using a  
361 method described in McKennan et al. [53]. We then computed  $P$  values for each CpG site and used  
362  $q$ -values [54] to control the false discovery rate at a nominal level. We took the same approach  
363 to determine CpGs whose DNAm changed from birth to age 7, except the response was measured  
364 as the difference in DNAm at birth and age 7. In this analysis, we included the child's gender,  
365 gestational age at birth, inferred genetic ancestry and sample collection site as covariates. Because  
366 all paired samples were on the same plate, we did not include plate number as a covariate in this  
367 analysis. We also estimated unobserved factors that influence differences in DNAm at birth and  
368 age 7 using McKennan et al. [53] and included these latent factors in our linear model.

## 369 **Joint modelling of DNA methylation at birth and age 7**

370 We used data from the self-reported Hispanic and Black individuals with DNAm measured at both  
371 time points to analyze the effect of ancestry on DNAm levels at CpGs  $g = 1, \dots, p = 784,484$   
372 using the following model:

$$373 \quad \mathbf{y}_g = \begin{pmatrix} \mathbf{y}_g^{(0)} \\ \mathbf{y}_g^{(7)} \end{pmatrix} = \begin{pmatrix} \mathbf{X}\boldsymbol{\beta}_g^{(0)} \\ \mathbf{X}\boldsymbol{\beta}_g^{(7)} \end{pmatrix} + \mathbf{Z}\boldsymbol{\gamma}_g + \mathbf{C}\boldsymbol{\ell}_g + \mathbf{e}_g, \quad (1a)$$

$$\begin{aligned}
 \begin{pmatrix} b_g^{(0)} \\ b_g^{(7)} \end{pmatrix} &= (\sigma_g^2 + \delta_g^2)^{-1/2} \begin{pmatrix} \beta_g^{(0)} \\ \beta_g^{(7)} \end{pmatrix} \sim \pi_{(0,0)} \delta_{(0,0)} + \sum_{k=1}^K \pi_{(1,0)}^{(k)} \begin{pmatrix} N_1(0, \tau_k^2) \\ \delta_0 \end{pmatrix} + \sum_{k=1}^K \pi_{(0,1)}^{(k)} \begin{pmatrix} \delta_0 \\ N_1(0, \tau_k^2) \end{pmatrix} \\
 &+ \sum_{s=1}^S \sum_{k=1}^K \pi_{(1,1)}^{(k,s)} N_2 \left( 0, \tau_k^2 \begin{pmatrix} 1 & \rho_s \\ \rho_s & 1 \end{pmatrix} \right), \tag{1b}
 \end{aligned}$$

$$e_g \sim N_{2n} \left( 0, \sigma_g^2 I_{2n} + \delta_g^2 \mathbf{B} \right), \mathbf{B}_{ij} = 1 \text{ \{samples } i \text{ and } j \text{ are from the same child}\}, \tag{1c}$$

where  $\delta_0$  and  $\delta_{(0,0)}$  are the point masses at  $0 \in \mathbb{R}$  and  $(0, 0) \in \mathbb{R}^2$ . The vector  $\mathbf{y}_g^{(a)} \in \mathbb{R}^n$  contained the DNAm levels at CpG  $g$  at age  $a$ ,  $\mathbf{X} \in \mathbb{R}^n$  contained each child's inferred genetic ancestry or self-reported race and  $\beta_g^{(a)}$  was the effect due to ancestry at age  $a$ .  $\mathbf{X}$  was standardized to have variance 1 when  $\mathbf{X}$  was inferred genetic ancestry. The nuisance covariates  $\mathbf{Z}$  contained an intercept for the cord blood and PBMC samples, sample collection site, gender, gestational age at birth and plate number. Since gestational age was only correlated with cord blood DNAm, we assumed the effect of gestational age on DNAm at age 7 was zero for all CpG sites. We estimated the unobserved covariates  $\mathbf{C}$  with McKennan et al. [55], which accounts for the correlation between samples from the same child.

The entries of the weight vector  $\boldsymbol{\pi} = \left( \pi_{(0,0)}, \pi_{(1,0)}^{(1)}, \dots, \pi_{(1,0)}^{(K)}, \pi_{(0,1)}^{(1)}, \dots, \pi_{(0,1)}^{(K)}, \pi_{(1,1)}^{(1,1)}, \dots, \pi_{(1,1)}^{(S,K)} \right)^T$  sum to 1, where we set  $K = 5$  and  $S = 4$ . Similar to Flutre et al. [56] and Stephens [57], we specified a grid of correlation coefficients  $\rho_s \in \{0, 1/3, 2/3, 1\}$  and a dense grid of effect sizes  $\tau_k \in \{0.05, 0.1, 0.15, 0.20, 0.25\}$  when  $\mathbf{X}$  was inferred genetic ancestry and  $\tau_k \in \{0.1, 0.15, 0.225, 0.3, 0.375\}$  when  $\mathbf{X}$  was reported race. We set  $\tau_4$  by first performing a univariate analysis and then estimating the variance of the effect sizes for CpGs with q-values  $\leq 0.05$ , and  $\tau_1$  was such that if  $b_g^{(a)} \sim N_1(0, \tau_1^2)$ , the expected number of CpGs significant at the Bonferroni threshold  $0.05/p$  in a univariate analysis would be smaller than 1 for  $a = 0, 7$ . The proportion of CpGs with non-zero reported race effects at both ages that fell in bin  $s = 1, \dots, 4$  was defined as  $\sum_{k=2}^K \pi_{(1,1)}^{(k,s)}$ , where we ignored the proportion when  $k = 1$ , because  $\tau_1$  was too small to differentiate from zero. The estimated proportion of CpGs in the  $\rho_s = 2/3$  or  $\rho_s = 1$  bins was still over 98% when we included  $\tau_1$ .



399 To fit the model, we first regressed out  $\mathbf{Z}$  and the estimated  $\mathbf{C}$  from both  $\mathbf{y}_g$  and  $\mathbf{X} \oplus \mathbf{X}$  and  
400 used the residuals in the downstream analysis. We estimated  $\sigma_g^2$  and  $\delta_g^2$  for each  $g = 1, \dots, p$  with  
401 restricted maximum likelihood (REML) and followed Stephens [57] and estimated  $\boldsymbol{\pi}$  by empirical  
402 Bayes via expectation maximization. Supplemental Figures S2 and S4 plot the estimate for  $\boldsymbol{\pi}$  in  
403 the reported race analysis. We then defined  $con_g$  and  $dis_g$  for each CpG  $g = 1, \dots, p$  as

$$\begin{aligned} 404 \quad con_g &= \hat{P}\{\beta_g^{(0)}, \beta_g^{(7)} > 0 \mid \mathbf{y}_g, \boldsymbol{\pi}, \sigma_g^2, \delta_g^2\} \vee \hat{P}\{\beta_g^{(0)}, \beta_g^{(7)} < 0 \mid \mathbf{y}_g, \boldsymbol{\pi}, \sigma_g^2, \delta_g^2\} \\ 405 \quad dis_g &= \hat{P}\left[\{\beta_g^{(0)} > 0, \beta_g^{(7)} \leq 0\} \cup \{\beta_g^{(0)} < 0, \beta_g^{(7)} \geq 0\} \cup \{\beta_g^{(0)} \geq 0, \beta_g^{(7)} < 0\}\right. \\ 406 \quad &\quad \left. \cup \{\beta_g^{(0)} \leq 0, \beta_g^{(7)} > 0\} \mid \mathbf{y}_g, \sigma_g^2, \delta_g^2, \boldsymbol{\pi}\right]. \\ 407 \end{aligned}$$

## 408 Determining meQTLs

409 We performed meQTL mapping in the 145 genotyped, self-reported Black children using the set  
410 of 269,622 SNPs with 100% genotype call rate in this subset. We restricted ourselves to this subset  
411 of samples to minimize heterogeneity in effect sizes. To identify CpG-SNP pairs, we considered  
412 SNPs within 5kb of each CpG, as this region has been previously shown to contain the majority of  
413 genetic variability in DNAm [8] and is small enough to mitigate the multiple testing burden, and  
414 computed a  $P$  value for the effect of the genotype at a single SNP on DNAm at the corresponding  
415 CpG with ordinary least squares. We then defined the meQTL for each CpG site as the SNP with  
416 the lowest  $P$  value. In addition to genotype, we included inferred genetic ancestry (i.e., ancestry  
417 PC1), gestational age at birth, gender, sample collection site and methylation plate number in the  
418 linear model, along with the first nine principal components of the residual DNAm data matrix after  
419 regressing out the intercept and the five additional covariates. We then tested the null hypothesis  
420 that a CpG did not have an meQTL in the 10kb region by using the minimum marginal  $P$  value in  
421 the region as the test statistic and computed its significance via bootstrap. We lastly used q-values  
422 to control the false discovery rate.

423 **Ethical statement**

424 We used de-identified single nucleotide polymorphism, DNA methylation and phenotype data from  
425 samples taken from human subjects as part of the Urban Environment and Childhood Asthma  
426 study. The WIRB approved human samples to be used in the Urban Environment and Childhood  
427 Asthma study (WIRB project number: 20142570).

## 428 References

- 429 1. A. Bird. “DNA methylation patterns and epigenetic memory”. In: *Genes and Development*  
430 16 (2002), pp. 6–21.
- 431 2. Z. D. Smith and A. Meissner. “DNA methylation: roles in mammalian development”. In:  
432 *Nature Reviews Genetics* 14.3 (2013), pp. 204–220.
- 433 3. S. B. Baylin and P. A. Jones. “Epigenetic Determinants of Cancer”. In: *Cold Spring Harbor*  
434 *perspectives in biology* 8.9 (Sept. 2016), a019505.
- 435 4. C. Ladd-Acosta, K. D. Hansen, E. Briem, M. D. Fallin, W. E. Kaufmann, and A. P. Feinberg.  
436 “Common DNA methylation alterations in multiple brain regions in autism”. In: *Molecular*  
437 *Psychiatry* 19 (Sept. 2013).
- 438 5. J. C. Rutledge, A. S. Yokoyama, and V. Medici. “DNA methylation alterations in Alzheimer’s  
439 disease”. In: *Environmental Epigenetics* 3.2 (June 2017).
- 440 6. M. A. Chan, C. E. Ciaccio, N. M. Gigliotti, M. Rezaiekhalthigh, J. A. Siedlik, K. Kennedy, and  
441 C. S. Barnes. “DNA methylation levels associated with race and childhood asthma severity”.  
442 In: *Journal of Asthma* 54.8 (Sept. 2017), pp. 825–832.
- 443 7. J. Nicodemus-Johnson et al. “DNA methylation in lung cells is associated with asthma endo-  
444 types and genetic risk”. In: *JCI Insight* 1.20 (Dec. 2016).
- 445 8. J. T. Bell, A. A. Pai, J. K. Pickrell, D. J. Gaffney, R. Pique-Regi, J. F. Degner, Y. Gilad,  
446 and J. K. Pritchard. “DNA methylation patterns associate with genetic and gene expression  
447 variation in HapMap cell lines”. In: *Genome Biology* 12.1 (2011), R10.
- 448 9. A. K. Smith, V. Kilaru, M. Kocak, L. M. Almli, K. B. Mercer, K. J. Ressler, F. A. Tylavsky,  
449 and K. N. Conneely. “Methylation quantitative trait loci (meQTLs) are consistently detected  
450 across ancestry, developmental stage, and tissue type”. In: *BMC Genomics* 15.1 (2014),  
451 p. 145.
- 452 10. C. V. Breton et al. “Prenatal Tobacco Smoke Exposure Is Associated with Childhood DNA  
453 CpG Methylation”. In: *PLOS ONE* 9.6 (June 2014), e99716–.
- 454 11. C. A. Markunas, Z. Xu, S. Harlid, P. A. Wade, R. T. Lie, J. A. Taylor, and A. J. Wilcox.  
455 “Identification of DNA methylation changes in newborns related to maternal smoking during  
456 pregnancy”. In: *Environmental health perspectives* 122.10 (Oct. 2014), pp. 1147–1153.
- 457 12. C. Ivorra, M. F. Fraga, G. F. Bayón, A. F. Fernández, C. Garcia-Vicent, F. J. Chaves, J.  
458 Redon, and E. Lurbe. “DNA methylation patterns in newborns exposed to tobacco in utero”.  
459 In: *Journal of Translational Medicine* 13.1 (Jan. 2015), p. 25.
- 460 13. R. C. Richmond et al. “Prenatal exposure to maternal smoking and offspring DNA methyla-  
461 tion across the lifecourse: findings from the Avon Longitudinal Study of Parents and Children  
462 (ALSPAC)”. In: *Human molecular genetics* 24.8 (Apr. 2015), pp. 2201–2217.
- 463 14. B. R. Joubert et al. “450K epigenome-wide scan identifies differential DNA methylation in  
464 newborns related to maternal smoking during pregnancy”. In: *Environmental health perspec-*  
465 *tives* 120.10 (Oct. 2012), pp. 1425–1431.

- 466 15. B. R. Joubert et al. “DNA Methylation in Newborns and Maternal Smoking in Pregnancy:  
467 Genome-wide Consortium Meta-analysis”. In: *The American Journal of Human Genetics*  
468 98.4 (2016), pp. 680–696.
- 469 16. P. Rzehak et al. “Maternal Smoking during Pregnancy and DNA-Methylation in Children  
470 at Age 5.5 Years: Epigenome-Wide-Analysis in the European Childhood Obesity Project  
471 (CHOP)-Study”. In: *PLOS ONE* 11.5 (May 2016), e0155554–.
- 472 17. S. Bocklandt, W. Lin, M. E. Sehl, F. J. Sánchez, J. S. Sinsheimer, S. Horvath, and E. Vilain.  
473 “Epigenetic Predictor of Age”. In: *PLOS ONE* 6.6 (June 2011), e14821–.
- 474 18. S. Horvath. “DNA methylation age of human tissues and cell types”. In: *Genome Biology*  
475 14.10 (2013), p. 3156.
- 476 19. S. Horvath et al. “Obesity accelerates epigenetic aging of human liver”. In: *Proceedings of*  
477 *the National Academy of Sciences* 111.43 (2014), pp. 15538–15543.
- 478 20. A. A. Johnson, K. Akman, S. R. G. Calimport, D. Wuttke, A. Stolzing, and J. P. de Mag-  
479 alhães. “The Role of DNA Methylation in Aging, Rejuvenation, and Age-Related Disease”.  
480 In: *Rejuvenation Research* 15.5 (2012), pp. 483–494.
- 481 21. A. K. Knight et al. “An epigenetic clock for gestational age at birth based on blood methyla-  
482 tion data”. In: *Genome Biology* 17.1 (2016), p. 206.
- 483 22. M. E. Levine and E. M. Crimmins. “Evidence of accelerated aging among African Americans  
484 and its implications for mortality”. In: *Social Science & Medicine* 118 (2014), pp. 27–32.
- 485 23. R. E. Marioni et al. “DNA methylation age of blood predicts all-cause mortality in later life”.  
486 In: *Genome Biology* 16.1 (2015), p. 25.
- 487 24. S. E. Parets, K. N. Conneely, V. Kilaru, S. J. Fortunato, T. A. Syed, G. Saade, A. K. Smith,  
488 and R. Menon. “Fetal DNA Methylation Associates with Early Spontaneous Preterm Birth  
489 and Gestational Age”. In: *PLOS ONE* 8.6 (June 2013), e67489–.
- 490 25. J. W. Schroeder et al. “Neonatal DNA methylation patterns associate with gestational age”.  
491 In: *Epigenetics* 6.12 (Dec. 2011), pp. 1498–1504.
- 492 26. G. Davey Smith, K. Tilling, M. Suderman, S. M. Ring, T. R. Gaunt, A. J. Simpkin, C. L.  
493 Relton, O. Lyttleton, and W. L. McArdle. “Longitudinal analysis of DNA methylation as-  
494 sociated with birth weight and gestational age”. In: *Human Molecular Genetics* 24.13 (Apr.  
495 2015), pp. 3752–3763.
- 496 27. D. Wu, H. Yang, S. J. Winham, Y. Natanzon, D. C. Koestler, T. Luo, B. L. Fridley, E. L.  
497 Goode, Y. Zhang, and Y. Cui. “Mediation analysis of alcohol consumption, DNA methyla-  
498 tion, and epithelial ovarian cancer”. In: *Journal of Human Genetics* 63.3 (2018), pp. 339–  
499 348.
- 500 28. J. V. Huang et al. “DNA methylation in blood as a mediator of the association of mid-  
501 childhood body mass index with cardio-metabolic risk score in early adolescence”. In: *Epi-*  
502 *genetics* 13.10-11 (2018), pp. 1072–1087.
- 503 29. R. M. Adkins, J. Krushkal, F. A. Tylavsky, and F. Thomas. “Racial differences in gene-  
504 specific DNA methylation levels are present at birth”. In: *Birth Defects Research Part A:*  
505 *Clinical and Molecular Teratology* 91.8 (2011), pp. 728–736.

- 506 30. K. Mozhui, A. K. Smith, and F. A. Tylavsky. “Ancestry Dependent DNA Methylation and  
507 Influence of Maternal Nutrition”. In: *PLOS ONE* 10.3 (Mar. 2015), e0118466–.
- 508 31. J. M. Galanter et al. “Differential methylation between ethnic sub-groups reflects the effect of  
509 genetic ancestry and environmental exposures”. In: *eLife* 6 (Jan. 2017), e20532. ISSN: 2050-  
510 084X.
- 511 32. H. Heyn et al. “DNA methylation contributes to natural human variation”. In: *Genome re-  
512 search* 23.9 (Sept. 2013), pp. 1363–1372.
- 513 33. E. L. Moen, X. Zhang, W. Mu, S. M. Delaney, C. Wing, J. McQuade, J. Myers, L. A. Godley,  
514 M. E. Dolan, and W. Zhang. “Genome-Wide Variation of Cytosine Modifications Between  
515 European and African Populations and the Implications for Complex Traits”. In: *Genetics*  
516 194.4 (Aug. 2013), p. 987.
- 517 34. E. Rahmani et al. “Genome-wide methylation data mirror ancestry information”. In: *Epige-  
518 netics & Chromatin* 10.1 (2017), p. 1.
- 519 35. A. B. Nguyen, R. Moser, and W. .-.Y. Chou. “Race and health profiles in the United States:  
520 an examination of the social gradient through the 2009 CHIS adult survey”. In: *Public Health*  
521 128.12 (2014), pp. 1076–1086.
- 522 36. J. E. Gern et al. “The Urban Environment and Childhood Asthma (URECA) birth cohort  
523 study: design, methods, and study population”. In: *BMC Pulmonary Medicine* 9.1 (2009),  
524 p. 17.
- 525 37. G. T. O’Connor et al. “Early-life home environment and risk of asthma among inner-city  
526 children”. In: *Journal of Allergy and Clinical Immunology* 141.4 (2018), pp. 1468–1475.
- 527 38. C. V. Breton et al. “Small-Magnitude Effect Sizes in Epigenetic End Points are Important  
528 in Children’s Environmental Health Studies: The Children’s Environmental Health and Dis-  
529 ease Prevention Research Center’s Epigenetics Working Group”. In: *Environmental Health*  
530 *Perspectives* 125.4 (Apr. 2017), pp. 511–526.
- 531 39. T. R. Gaunt et al. “Systematic identification of genetic influences on methylation across the  
532 human life course”. In: *Genome Biology* 17.1 (2016), p. 61.
- 533 40. J. Fu et al. “Unraveling the Regulatory Mechanisms Underlying Tissue-Dependent Genetic  
534 Variation of Gene Expression”. In: *PLOS Genetics* 8.1 (Jan. 2012), e1002431–.
- 535 41. D. Lin, J. Chen, N. Perrone-Bizzozero, J. R. Bustillo, Y. Du, V. D. Calhoun, and J. Liu. “Char-  
536 acterization of cross-tissue genetic-epigenetic effects and their patterns in schizophrenia”. In:  
537 *Genome medicine* 10.1 (Feb. 2018), pp. 13–13.
- 538 42. A. B. Nguyen, R. Moser, and W. .-.Y. Chou. “Race and health profiles in the United States:  
539 an examination of the social gradient through the 2009 CHIS adult survey”. In: *Public Health*  
540 128.12 (2014), pp. 1076–1086.
- 541 43. R. F. Pérez, P. Santamarina, J. R. Tejedor, R. G. Urdinguio, J. Álvarez-Pitti, P. Redon, A. F.  
542 Fernández, M. F. Fraga, and E. Lurbe. “Longitudinal genome-wide DNA methylation anal-  
543 ysis uncovers persistent early-life DNA methylation changes”. In: *Journal of translational*  
544 *medicine* 17.1 (Jan. 2019), pp. 15, 15–15.

- 545 44. E. M. Martin and R. C. Fry. “Environmental Influences on the Epigenome: Exposure- Associated DNA Methylation in Human Populations”. In: *Annual Review of Public Health* 39.1  
546 (2018), pp. 309–333.  
547
- 548 45. L. Peixoto, D. Risso, S. G. Poplawski, M. E. Wimmer, T. P. Speed, M. A. Wood, and T. Abel.  
549 “How data analysis affects power, reproducibility and biological insight of RNA-seq studies  
550 in complex datasets”. In: *Nucleic Acids Research* 43.16 (Sept. 2015), pp. 7664–7674.
- 551 46. C. Yao, H. Li, X. Shen, Z. He, L. He, and Z. Guo. “Reproducibility and Concordance of  
552 Differential DNA Methylation and Gene Expression in Cancer”. In: *PLOS ONE* 7.1 (Jan.  
553 2012), e29686–.
- 554 47. S. Gonseth et al. “Genetic contribution to variation in DNA methylation at maternal smoking-  
555 sensitive loci in exposed neonates”. In: *Epigenetics* 11.9 (Sept. 2016), pp. 664–673.
- 556 48. M. J. Aryee, A. E. Jaffe, H. Corrada-Bravo, C. Ladd-Acosta, A. P. Feinberg, K. D. Hansen,  
557 and R. A. Irizarry. “Minfi: a flexible and comprehensive Bioconductor package for the anal-  
558 ysis of Infinium DNA methylation microarrays”. In: *Bioinformatics* 30.10 (2014), pp. 1363–  
559 1369.
- 560 49. J. Maksimovic, L. Gordon, and A. Oshlack. “SWAN: Subset-quantile Within Array Normal-  
561 ization for Illumina Infinium HumanMethylation450 BeadChips”. In: *Genome Biology* 13.6  
562 (June 2012), R44.
- 563 50. P. Du, X. Zhang, C.-C. Huang, N. Jafari, W. A. Kibbe, L. Hou, and S. M. Lin. “Comparison of  
564 Beta-value and M-value methods for quantifying methylation levels by microarray analysis”.  
565 In: *BMC Bioinformatics* 11 (2010), pp. 587–587.
- 566 51. A. Tandon, N. Patterson, and D. Reich. “Ancestry Informative Marker Panels for African  
567 Americans Based on Subsets of Commercially Available SNP Arrays”. In: *Genetic epidemi-  
568 ology* 35.1 (Jan. 2011), pp. 80–83.
- 569 52. †. I. H. Consortium. “The International HapMap Project”. In: *Nature* 426 (Dec. 2003).
- 570 53. C. McKennan and D. Nicolae. “Accounting for unobserved covariates with varying degrees  
571 of estimability in high-dimensional biological data”. In: *Biometrika* 106.4 (Sept. 2019), pp. 823–  
572 840. ISSN: 0006-3444.
- 573 54. J. D. Storey. “A direct approach to false discovery rates”. In: *J. R. Statist. Soc. B* 63.3 (2001),  
574 pp. 479–498.
- 575 55. C. McKennan and D. Nicolae. “Estimating and accounting for unobserved covariates in high  
576 dimensional correlated data”. In: *arXiv:1808.05895v2* (2018).
- 577 56. T. Flutre, X. Wen, J. Pritchard, and M. Stephens. “A Statistical Framework for Joint eQTL  
578 Analysis in Multiple Tissues”. In: *PLoS Genetics* 9.5 (May 2013), e1003486.
- 579 57. M. Stephens. “False discovery rates: a new deal”. In: *Biostatistics* 18.2 (2017), pp. 275–294.

## 580 **Figure legends**

581 **Figure 1:** Estimated ancestry principal components (PCs) 1 and 2. Nearly all the variation in  
582 ancestry separates along PC1 in the URECA sample. Filled triangles represent the 196 URECA  
583 children in this study, with their self-reported race shown in different colors. Open circles are  
584 reference control samples from HapMap; red = Utah residents from northern and western Europe  
585 (CEU); yellow = east Asian (Chinese and Japanese); dark blue = Africans from Nigeria (Yoruban).

586  
587 **Figure 2:** Overlapping ancestry CpGs at birth and at age 7. (a): self-reported race-associated  
588 CpGs (RR-CpGs) with  $con_g \geq 0.8$  (violet) or  $dis_g \geq 0.8$  (red or blue). A discordant RR-CpG was  
589 classified as significant at birth but not at age 7 (blue) if the marginal posterior probability that the  
590 effect was non-zero at birth was greater than that at age 7. Discordant RR-CpGs that were signifi-  
591 cant at age 7 but not at birth (red) were defined analogously. (b): The same as (a), but for inferred  
592 genetic ancestry-associated CpGs (IGA-CpGs). (c): The overlap between RR-CpGs ( $con_g \geq 0.8$   
593 or  $dis_g \geq 0.8$ ) and IGA-CpGs ( $con_g \geq 0.8$  or  $dis_g \geq 0.8$ ).

594  
595 **Figure 3:** RR-CpGs are enriched for CpGs with meQTLs. (a) Illustration of the causal relationship  
596 between the DNAm (M) at a CpG site, the genotype (G) at the SNP within  $\pm 5\text{kb}$  of the CpG that  
597 had the smallest meQTL  $P$  value and self-reported race (RR). Each graph corresponds to a unique  
598 CpG. (b) Plots of the meQTL  $P$  value for edge  $a$  in CBMCs at birth, where CpGs were stratified  
599 by whether or not it was an RR-CpG ( $con_g \geq 0.8$  or  $dis_g \geq 0.8$ ). The ten enlarged red circles are  
600 just for visual aid.

601  
602 **Figure 4:** meQTL  $P$  value enrichment, where circled blue points are for visual aid (left), and  
603 the relative proportion of variance in DNAm levels explained by genotype (right). The x-axis of  
604 the latter was defined as the ratio of the proportion of variance in DNAm levels explained by the  
605 genotype of each CpG's closest SNP to the sum of the aforementioned genetic proportion and the  
606 proportion explained by maternal cotinine levels during pregnancy. A ratio  $> 0.5$  indicates that  
607 local genotype explained more variance than maternal cotinine levels during pregnancy.

608 **Tables**

**Table 1:** Covariates for the  $n = 196$  URECA children in our study, stratified by self-reported race.

|                                                   | <b>Black</b> | <b>Hispanic</b> | <b>White</b> | <b>Mixed</b> | <b>Other</b> |
|---------------------------------------------------|--------------|-----------------|--------------|--------------|--------------|
| Sample Size                                       | 147          | 39              | 1            | 7            | 2            |
| Males (%)                                         | 71 (48%)     | 25 (64%)        | 0 (0%)       | 4 (57%)      | 0 (0%)       |
| Asthma diagnosis at age 7 (%)                     | 38 (26%)     | 12 (31%)        | 0 (0%)       | 2 (29%)      | 0 (0%)       |
| Gestational age at birth, in weeks (mean [range]) | 39.0 [34,42] | 38.9 [35,41]    | 36.0         | 39.1 [37,40] | 39.0 [38,40] |
| <b>Sample Collection Site</b>                     |              |                 |              |              |              |
| Baltimore (%)                                     | 64 (44%)     | 1 (3%)          | 1 (100%)     | 3 (43%)      | 2 (100%)     |
| Boston (%)                                        | 17 (12%)     | 5 (13%)         | 0 (0%)       | 2 (29%)      | 0 (0%)       |
| New York (%)                                      | 23 (16%)     | 32 (82%)        | 0 (0%)       | 1 (14%)      | 0 (0%)       |
| St. Louis (%)                                     | 43 (29%)     | 1 (3%)          | 0 (0%)       | 1 (14%)      | 0 (0%)       |

**Table 2:** Sample size and composition for each analysis.

|                                                  | <b>Black</b> | <b>Hispanic</b> | <b>White</b> | <b>Mixed</b> | <b>Other</b> |
|--------------------------------------------------|--------------|-----------------|--------------|--------------|--------------|
| <b>Inferred genetic ancestry, paired samples</b> | 143          | 37              | 0            | 0            | 0            |
| <b>Self-reported race, paired samples</b>        | 145          | 38              | 0            | 0            | 0            |
| <b>Age (birth to age 7), paired samples</b>      | 143          | 37              | 1            | 7            | 2            |
| <b>Gestational age at birth</b>                  | 144          | 37              | 1            | 7            | 2            |
| <b>meQTLs at birth</b>                           | 144          | 0               | 0            | 0            | 0            |
| <b>meQTLs at age 7</b>                           | 144          | 0               | 0            | 0            | 0            |
| <b>Maternal cotinine levels at birth*</b>        | 132          | 38              | 1            | 6            | 2            |
| <b>Maternal cotinine levels at age 7*</b>        | 134          | 37              | 1            | 6            | 2            |

\*15 of the mothers did not have cord blood plasma cotinine measurements.



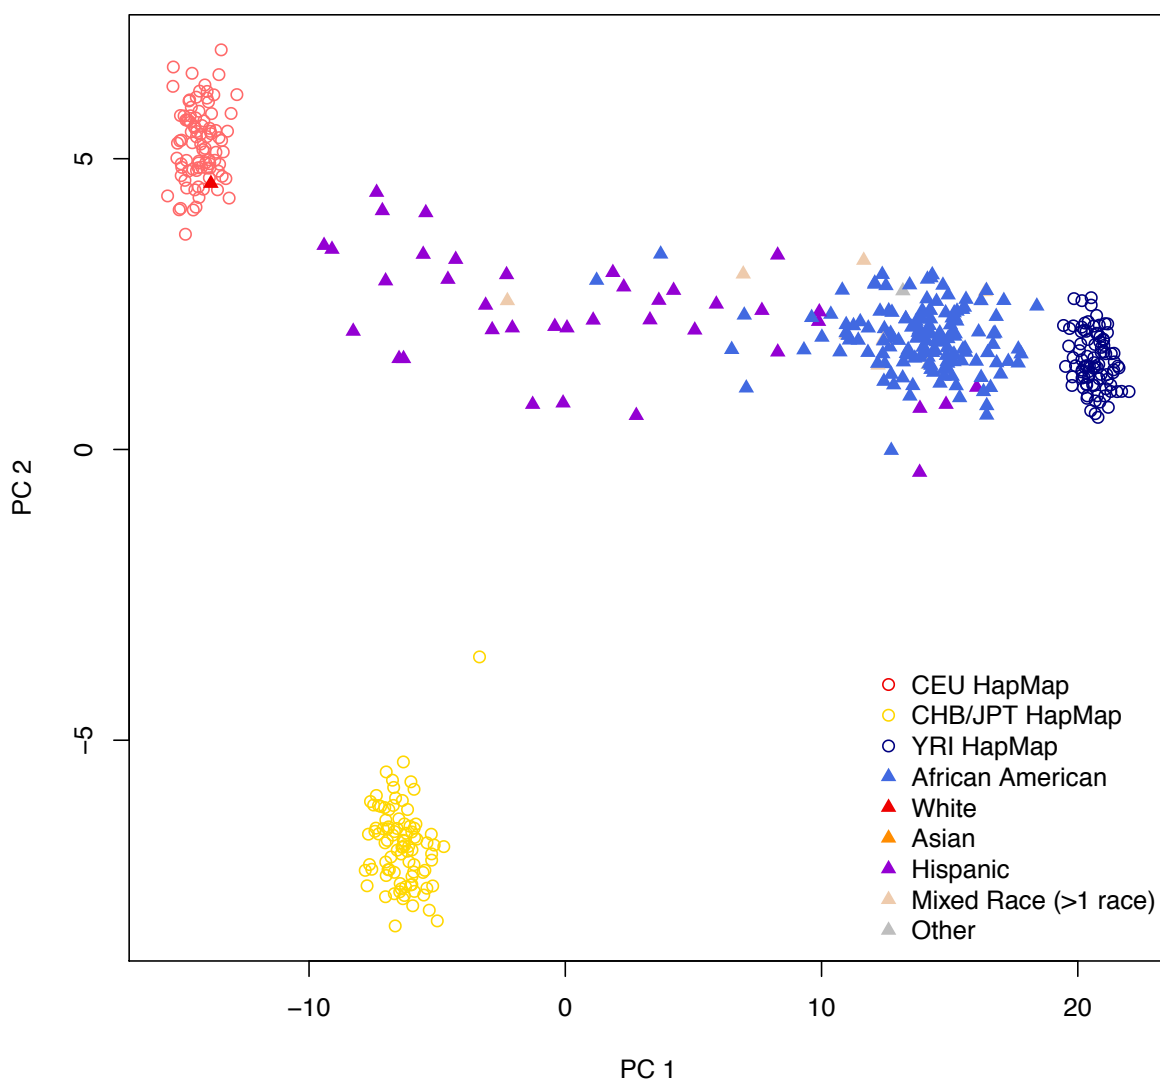

**Figure 1**

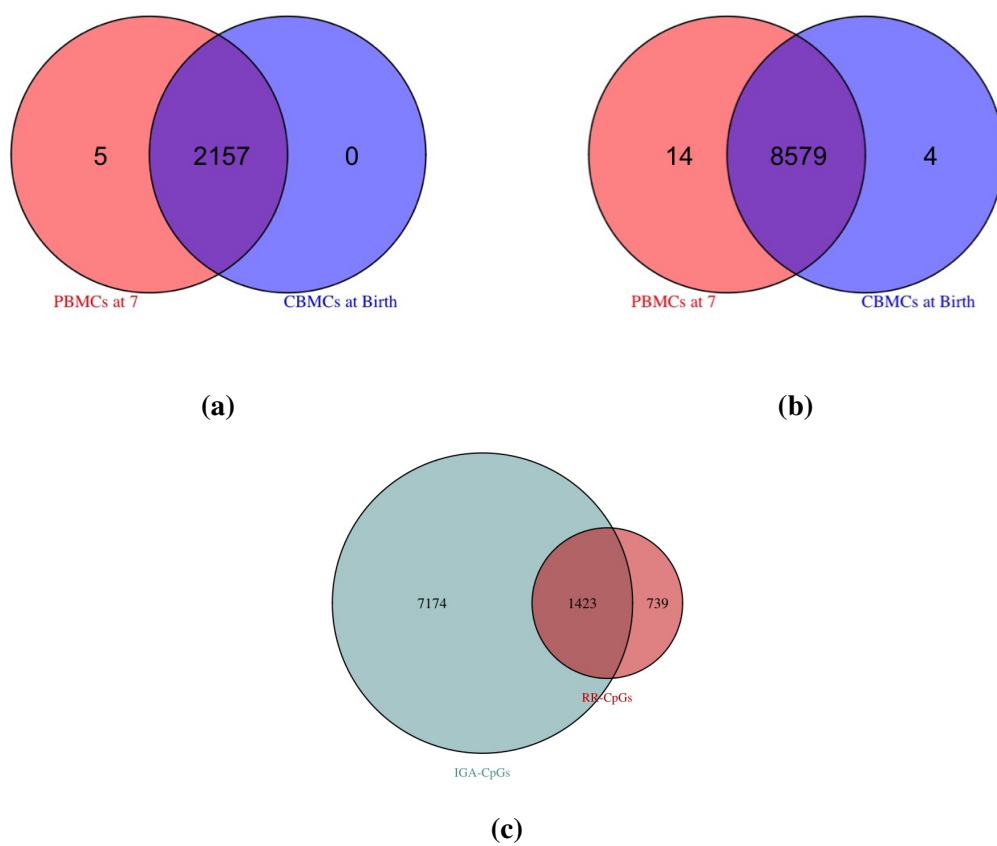

**Figure 2**

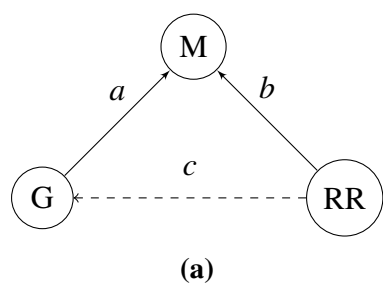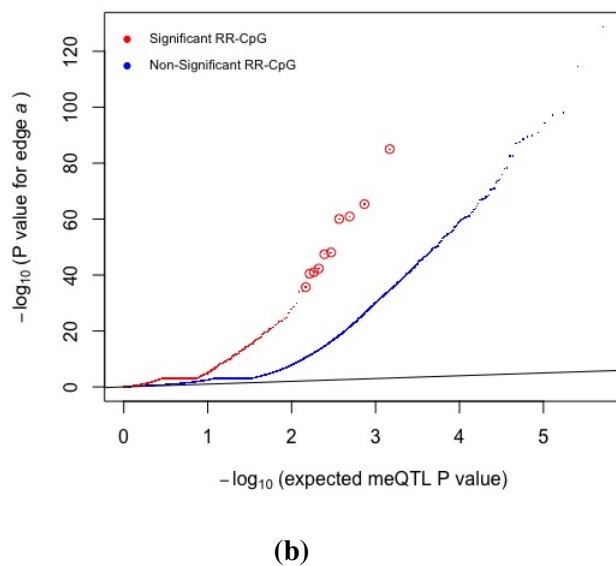

**Figure 3**

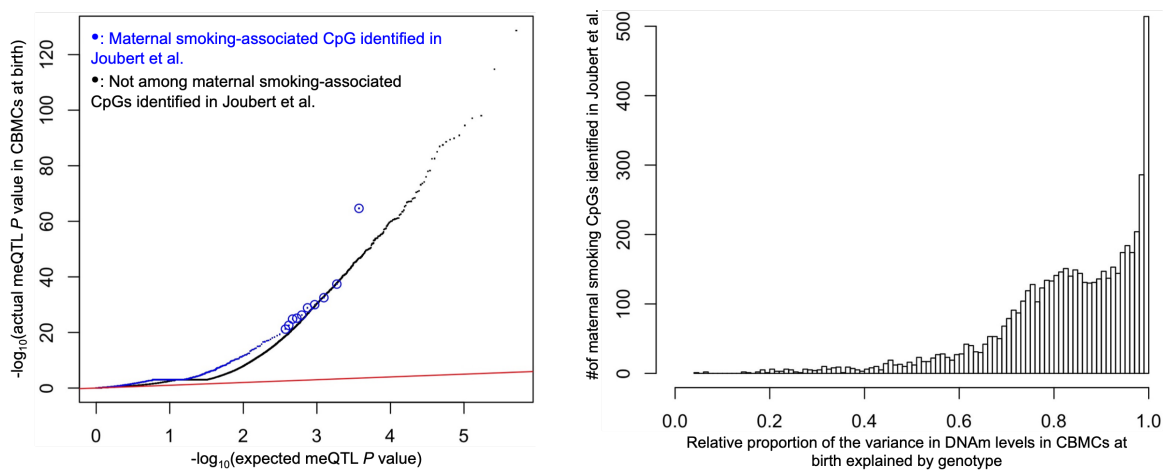

**Figure 4**
